# Supplementary material
Source: PubMed Central journal article supplement (PMC7442721)
Supplement: NIHMS1583659-supplement-2.pdf [file NIHMS1583659-supplement-2.pdf]

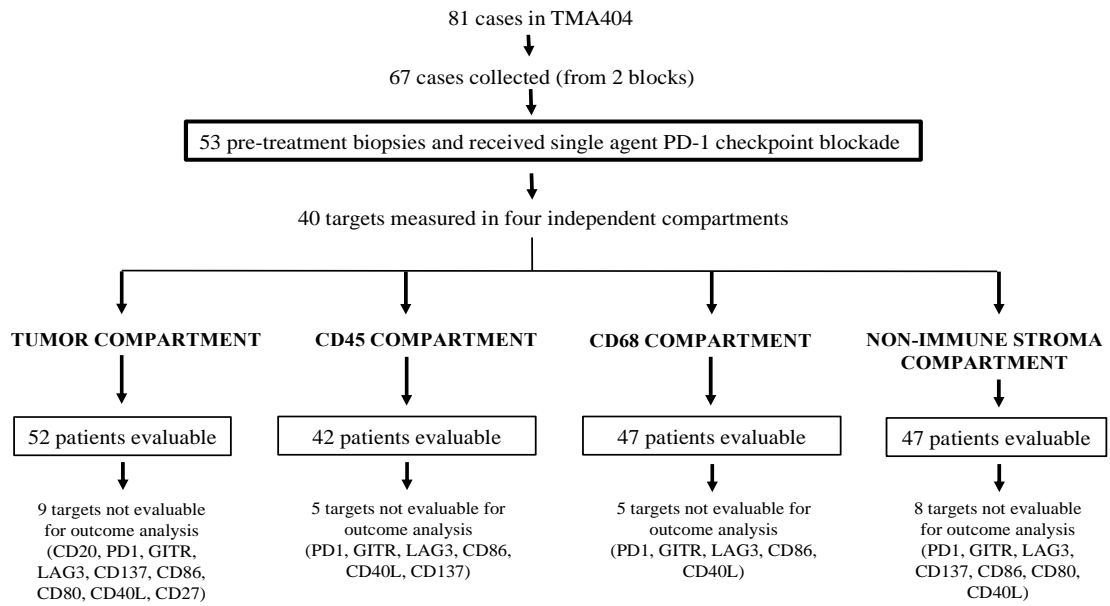

**Supplementary figure S1.** Study flowchart for spatially-resolved immune biomarker discovery in YTMA404 cohort
