# Supplementary material
Source: PubMed Central journal article supplement (PMC7442721)
Supplement: NIHMS1583659-supplement-3.pdf [file NIHMS1583659-supplement-3.pdf]

## Normalized counts

## Signal to background ratio

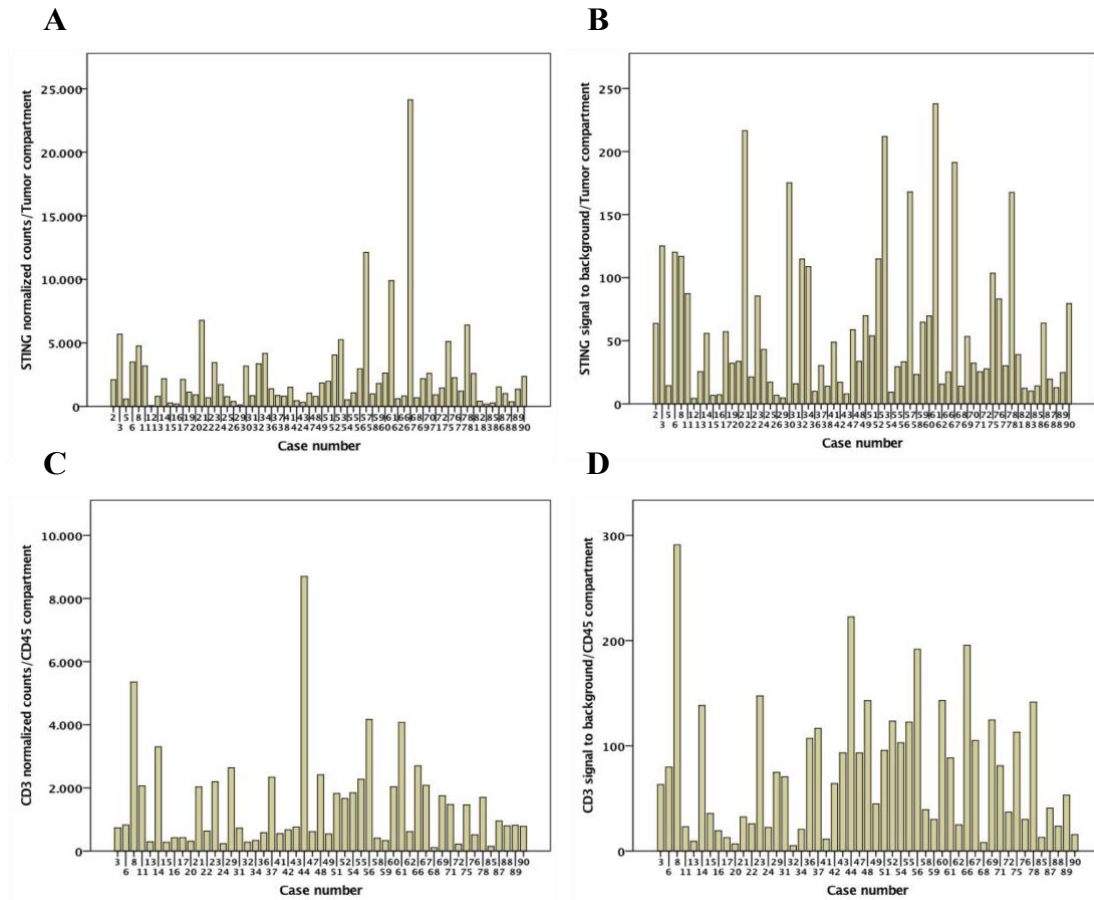

**Supplementary figure S2.** Representative histograms showing normalized STING counts (A) and signal to background ratios (B) in the tumor compartment, and normalized CD3 counts (C) and signal to background ratios (D) in the CD45 compartment, as representative markers with high signal relative to non-specific counts
