# Supplementary material
Source: PubMed Central journal article supplement (PMC7442721)
Supplement: NIHMS1583659-supplement-4.pdf [file NIHMS1583659-supplement-4.pdf]

## Normalized counts

## Signal to background ratio

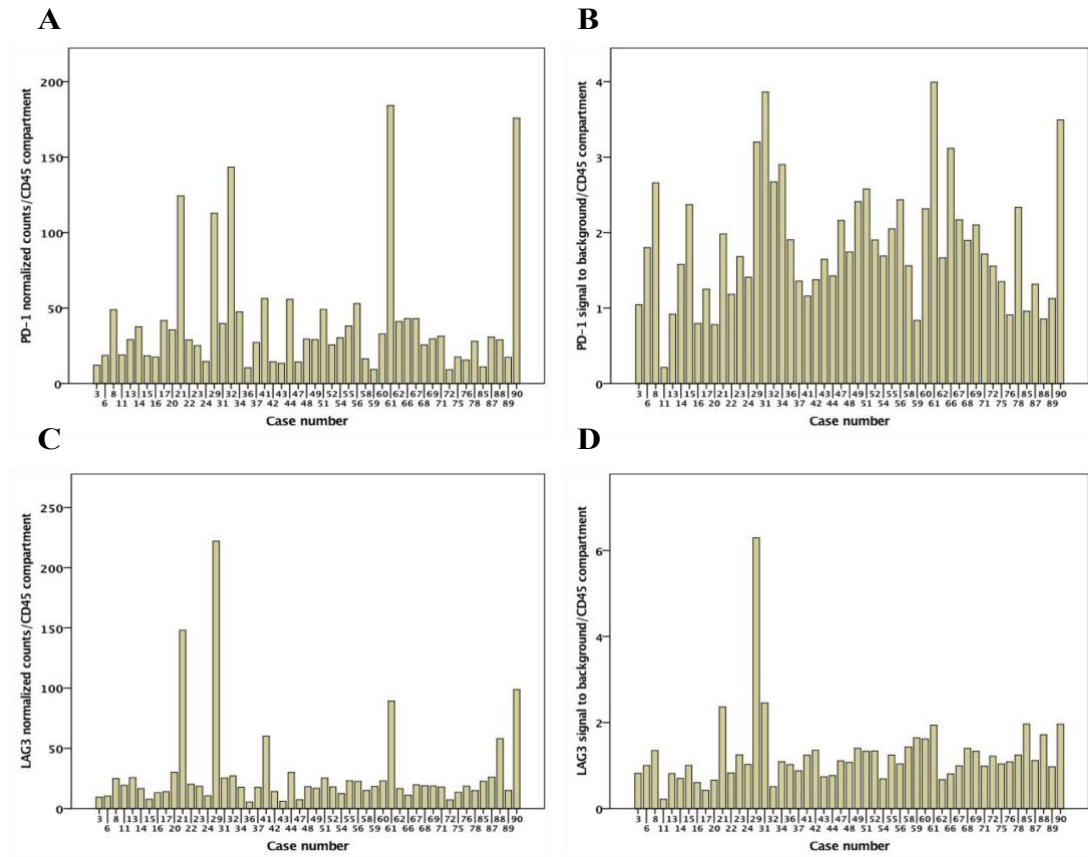

**Supplementary figure S3.** Representative histograms showing normalized PD-1 counts (A) and signal to background ratios (B) in the CD45 compartment, and normalized LAG3 counts (C) and signal to background ratios (D) in the CD45 compartment, as representative markers with low signal relative to non-specific counts
