# Supplementary material
Source: PubMed Central journal article supplement (PMC7442721)
Supplement: NIHMS1583659-supplement-5.pdf [file NIHMS1583659-supplement-5.pdf]

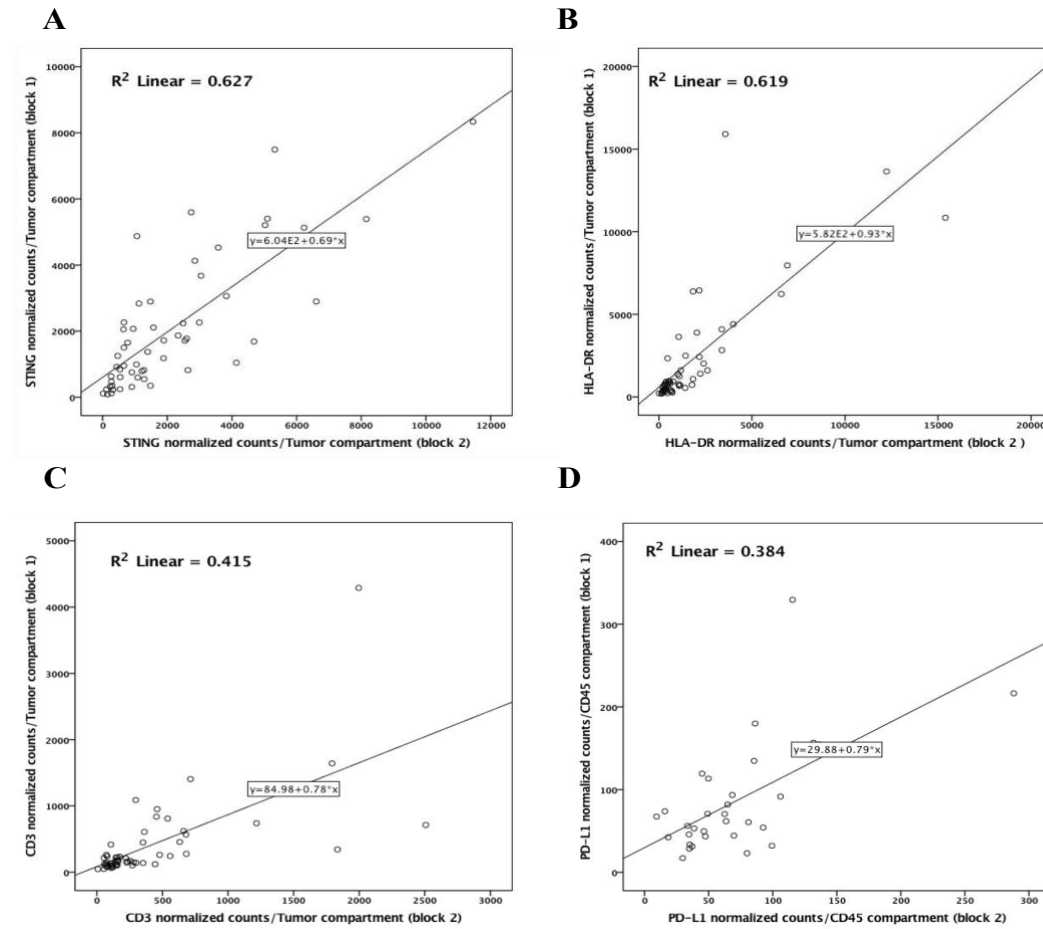

**Supplementary figure S4.** Correlation between STING expression in the tumor compartment (A) and HLA-DR expression in the tumor compartment (B) in YTMA404 block 1 and YTMA404 block 2; and correlation between CD3 expression in the CD45 compartment (C) and PD-L1 expression in the tumor compartment (D) YTMA404 block 1 and YTMA404 block 2 (B)
