# Supplementary material
Source: PubMed Central journal article supplement (PMC7442721)
Supplement: NIHMS1583659-supplement-6.pdf [file NIHMS1583659-supplement-6.pdf]

## Fluorescence image

## Compartmentalized image

panCK/CD45/CD68

Tumor/CD45/CD68/Non-immune cell stroma

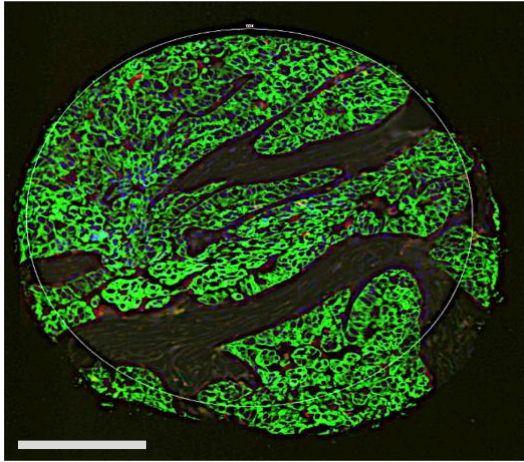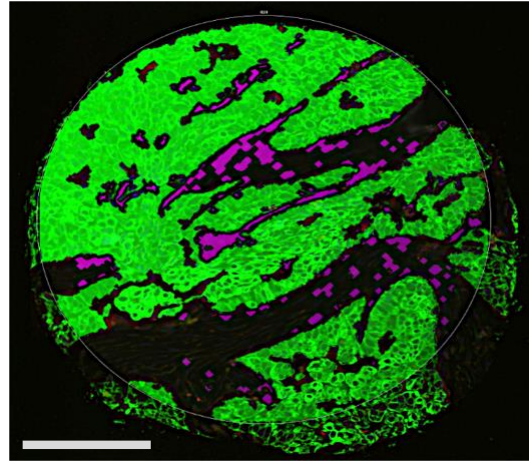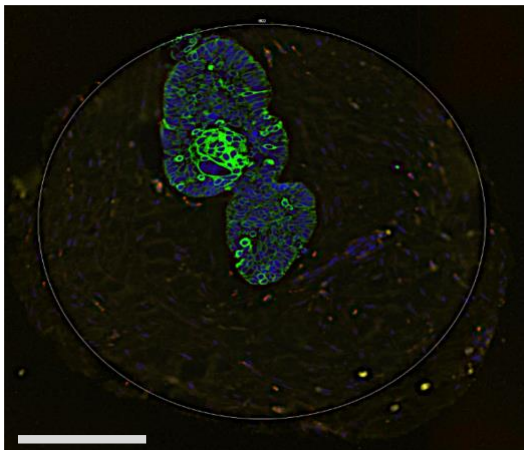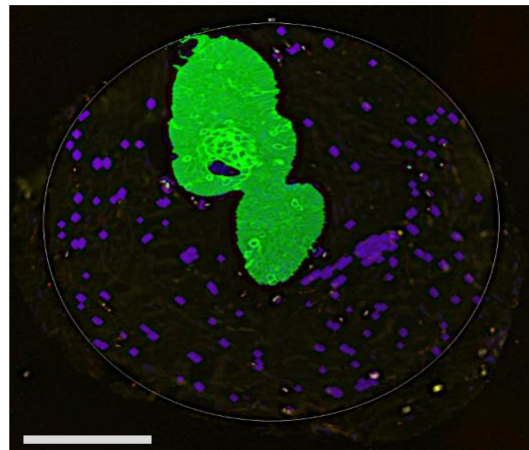

**Supplementary figure S5.** Representative cases that were unevaluable for CD45/CD68-related discoveries due to small area/absence of CD45/CD68 compartments (scale bar 100  $\mu$ m)
