# Supplementary material
Source: PubMed Central journal article supplement (PMC7442721)
Supplement: NIHMS1583659-supplement-7.pdf [file NIHMS1583659-supplement-7.pdf]

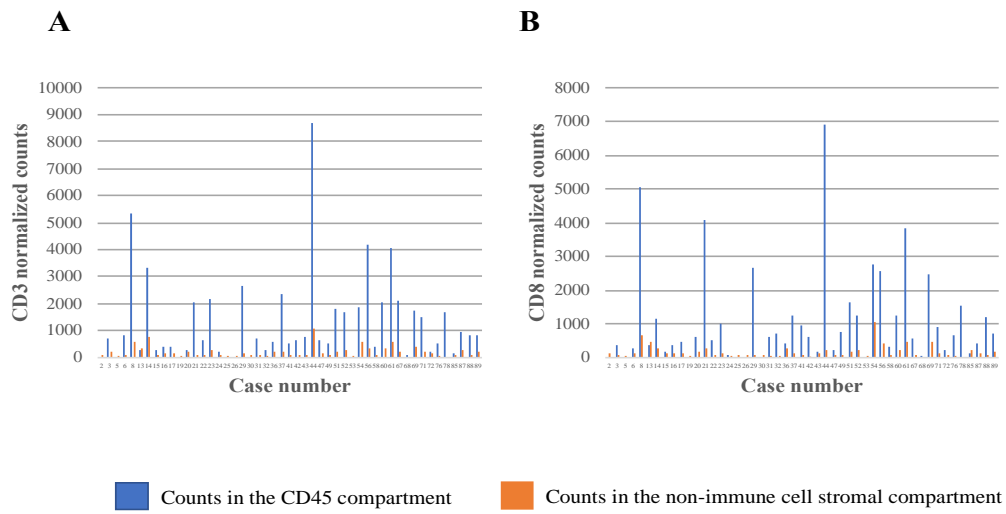

**Supplementary figure S6.** Histogram showing CD3 counts (A) and CD8 counts (B) in the CD45 compartment (blue) and non-immune cells stromal compartment (orange) on each NSCLC case
