# Supplementary material
Source: PubMed Central journal article supplement (PMC7442721)
Supplement: NIHMS1583659-supplement-8.pdf [file NIHMS1583659-supplement-8.pdf]

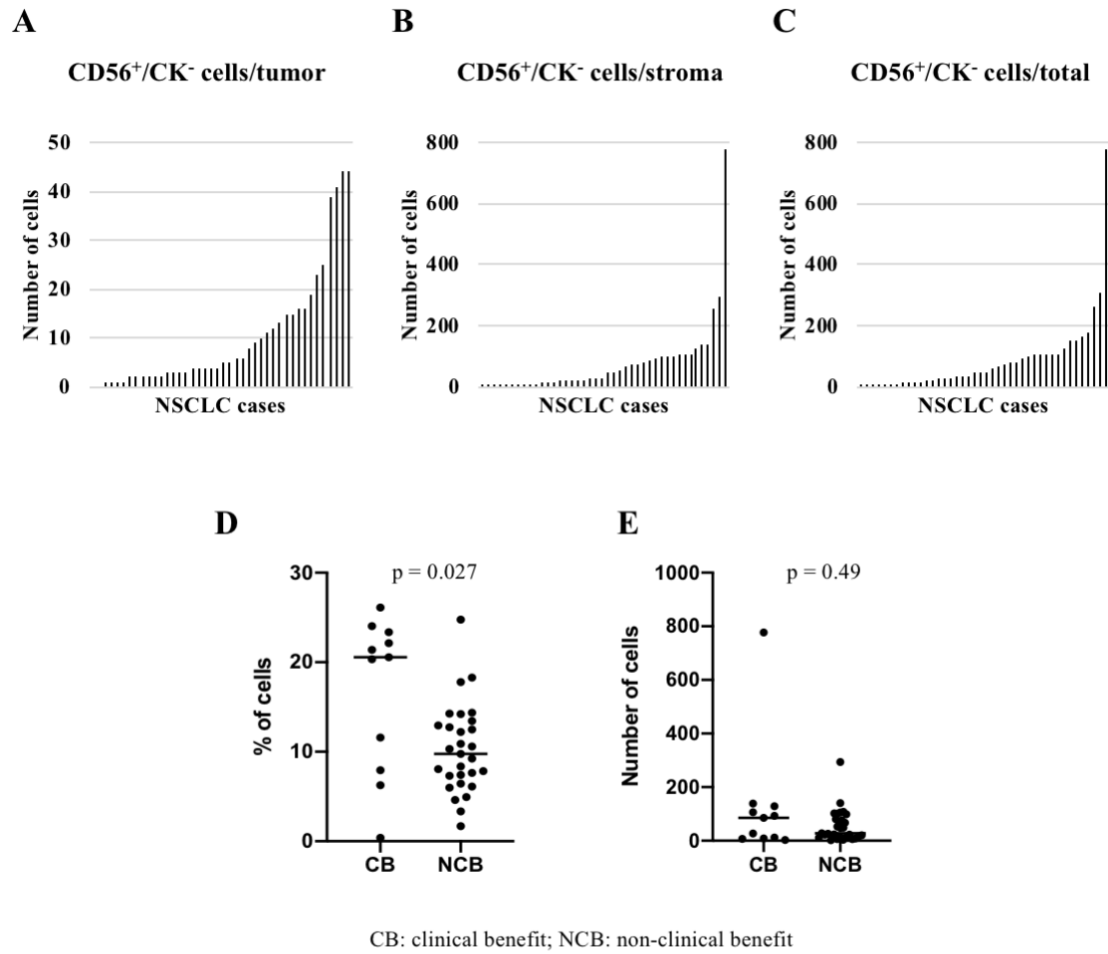

**Supplementary figure S7.** Absolute CD56<sup>+</sup>/CK<sup>-</sup> cell count distribution in the tumor compartment (A), the stromal compartment (B), and the entire TMA core (C); Percentage of CD56<sup>+</sup>/CK<sup>-</sup> cells in the stroma according to CB groups (D); Absolute CD56<sup>+</sup>/CK<sup>-</sup> cell counts according to clinical benefit groups (E)
