# Supplementary material
Source: PubMed Central journal article supplement (PMC7442721)
Supplement: NIHMS1583659-supplement-9.pdf [file NIHMS1583659-supplement-9.pdf]

**A****CD56<sup>+</sup>/CD3<sup>-</sup> cell counts/stroma**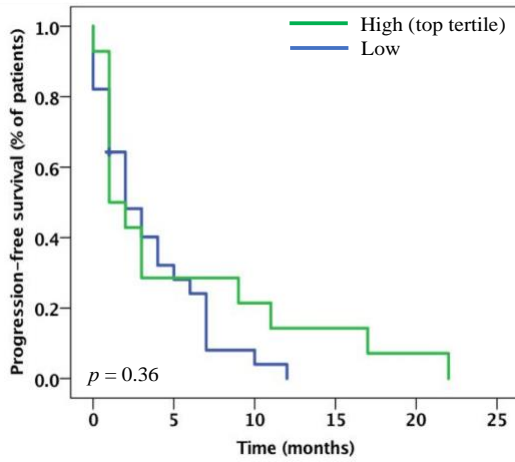**B****CD56<sup>+</sup>/CD3<sup>+</sup> cell counts/stroma**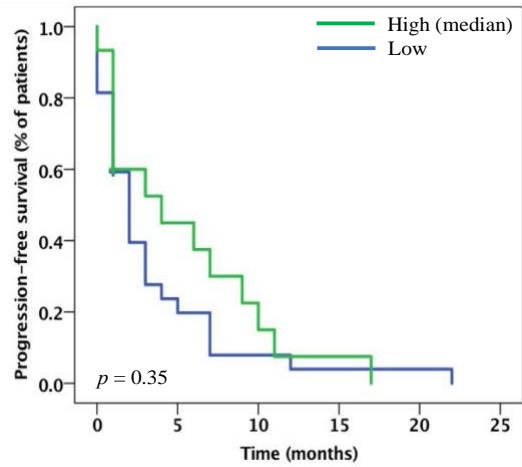**C****CD56<sup>+</sup>/CD3<sup>-</sup> cell counts/stroma**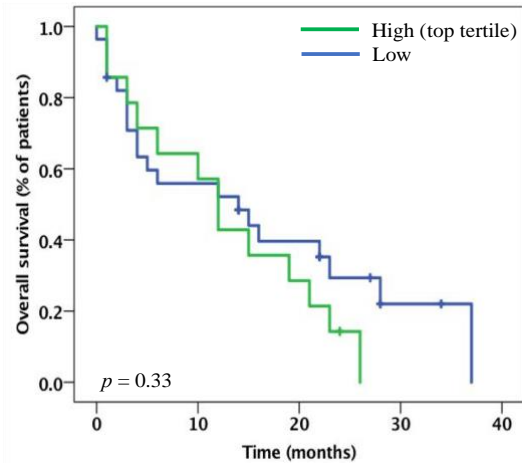**D****CD56<sup>+</sup>/CD3<sup>+</sup> cell counts/stroma**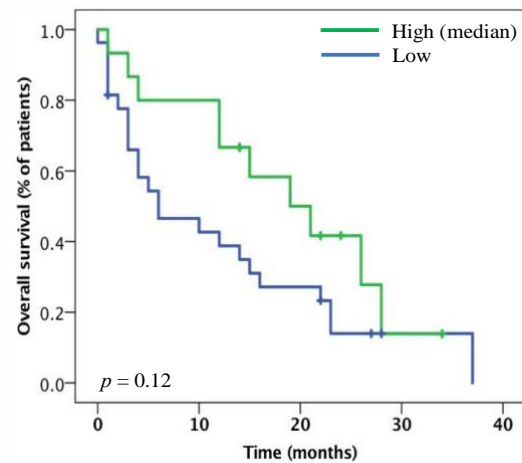

**Supplementary figure S8.** A-B. PFS according to CD56<sup>+</sup>/CD3<sup>-</sup> cell counts in stroma (A) and CD56<sup>+</sup>/CD3<sup>+</sup> cell counts in stroma (B); C-D. OS according to CD56<sup>+</sup>/CD3<sup>-</sup> cell counts in stroma (C) and CD56<sup>+</sup>/CD3<sup>+</sup> cell counts in stroma (D)
