# Supplementary material
Source: PubMed Central journal article supplement (PMC7442721)
Supplement: NIHMS1583659-supplement-10.pdf [file NIHMS1583659-supplement-10.pdf]

## Normalized counts

## Signal to background ratio

**A**

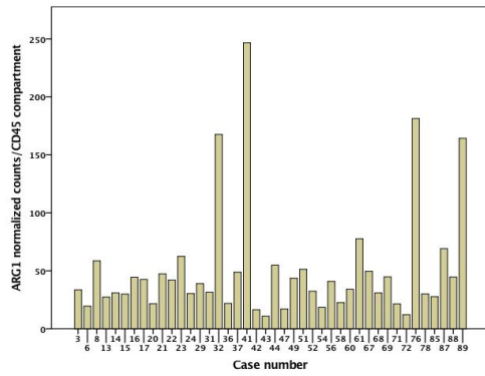

**B**

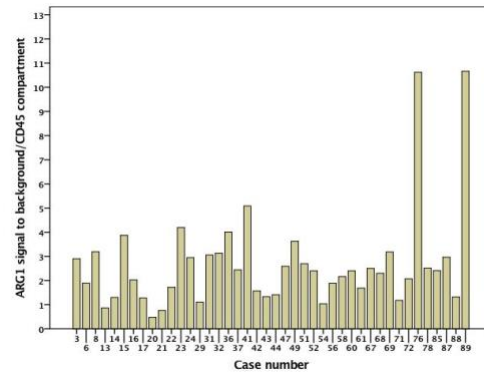

**Supplementary figure S9.** Histograms showing normalized ARG1 counts (A) and signal to background ratios (B) in the CD45 compartment
